# Supplementary material
Source: publisher site journal article supplement (https://www.dovepress.com/article/259547)
Supplement: Supplementary file 1 [file get_supplementary_file.php]

## **Synthesis and cytotoxic property of Annonaceous acetogenin**

### **glycoconjugates**

Jing-Fang Shi <sup>a,b</sup>, Ping Wu<sup>b</sup>, Xiao-Li Cheng<sup>b</sup>, Xiao-Yi Wei <sup>b,\*</sup>, Zi-Hua Jiang <sup>c,\*</sup>

<sup>a</sup>Agro-Biological Gene Research Center, Guangdong Academy of Agricultural Sciences, Guangzhou 510640, China

<sup>b</sup>Key Laboratory of Plant Resources Conservation and Sustainable Utilization, South China Botanical Garden, Chinese Academy of Sciences, Xingke Road 723, Tianhe District, Guangzhou 510650, China

<sup>c</sup>Department of Chemistry, Lakehead University, 955 Oliver Road, Thunder Bay, Ontario P7B 5E1, Canada

### **Supplementary Material**

**<sup>1</sup>H and <sup>13</sup>C NMR Spectra of Compounds 4, 5, 11 – 15, 17 and 18.**

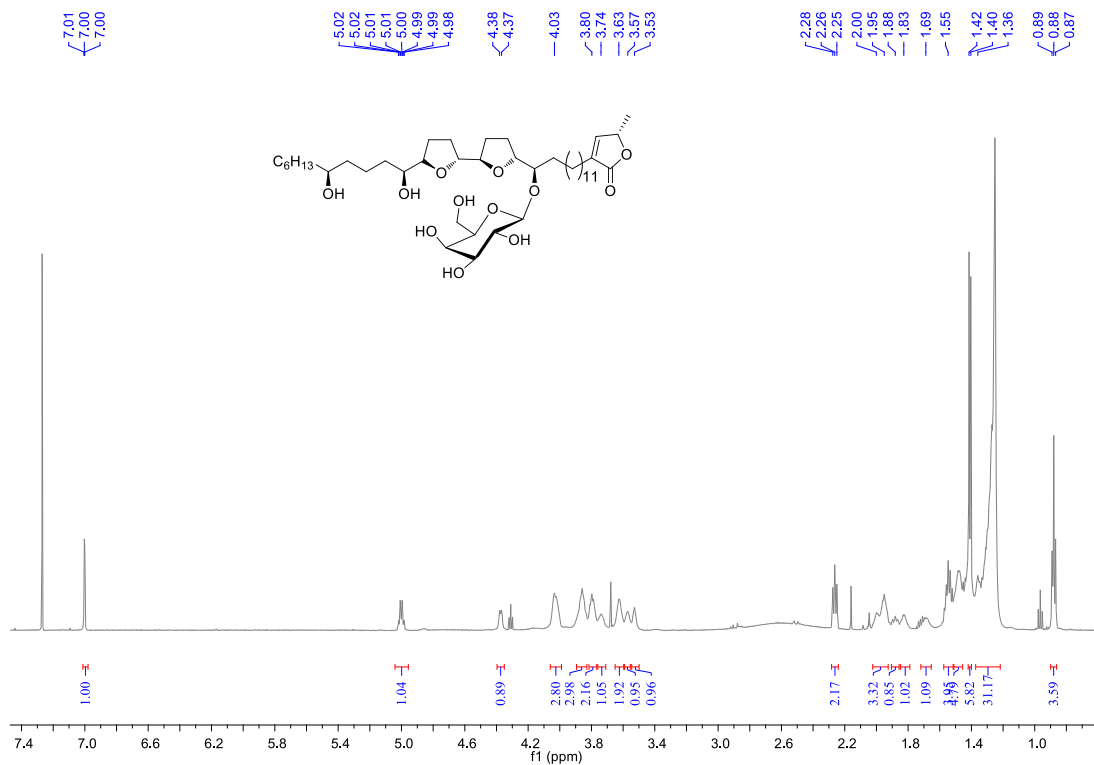

Figure 1s.  $^1\text{H}$  NMR Spectrum of 4 (600 MHz,  $\text{CDCl}_3$ )

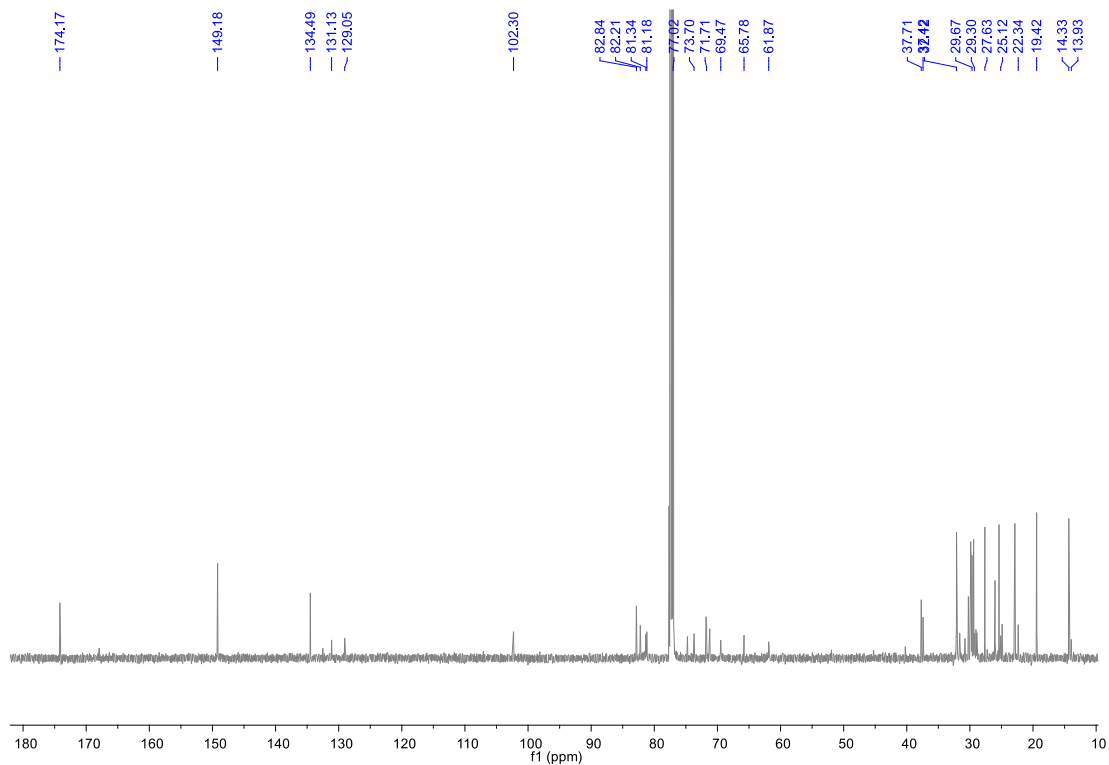

Figure 2s.  $^{13}\text{C}$  NMR Spectrum of 4 (150 MHz,  $\text{CDCl}_3$ )

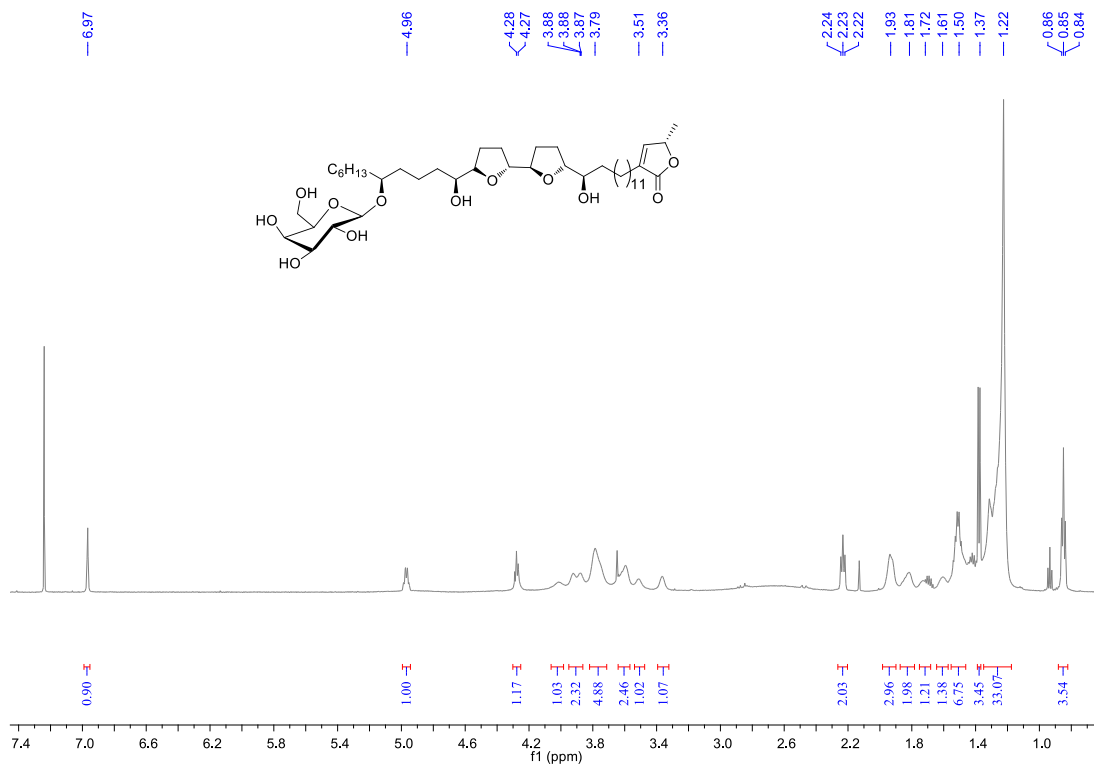

Figure 3s. <sup>1</sup>H NMR Spectrum of 5 (600 MHz, CDCl<sub>3</sub>)

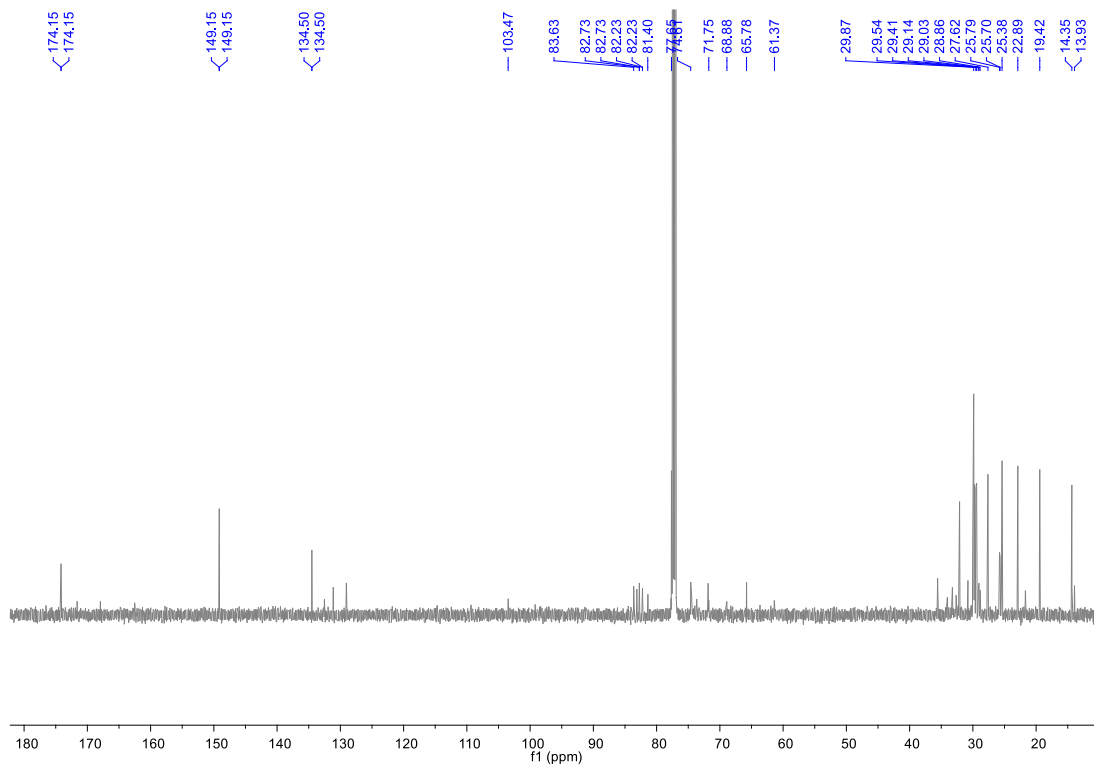

Figure 4s. <sup>13</sup>C NMR Spectrum of 5 (150 MHz, CDCl<sub>3</sub>)

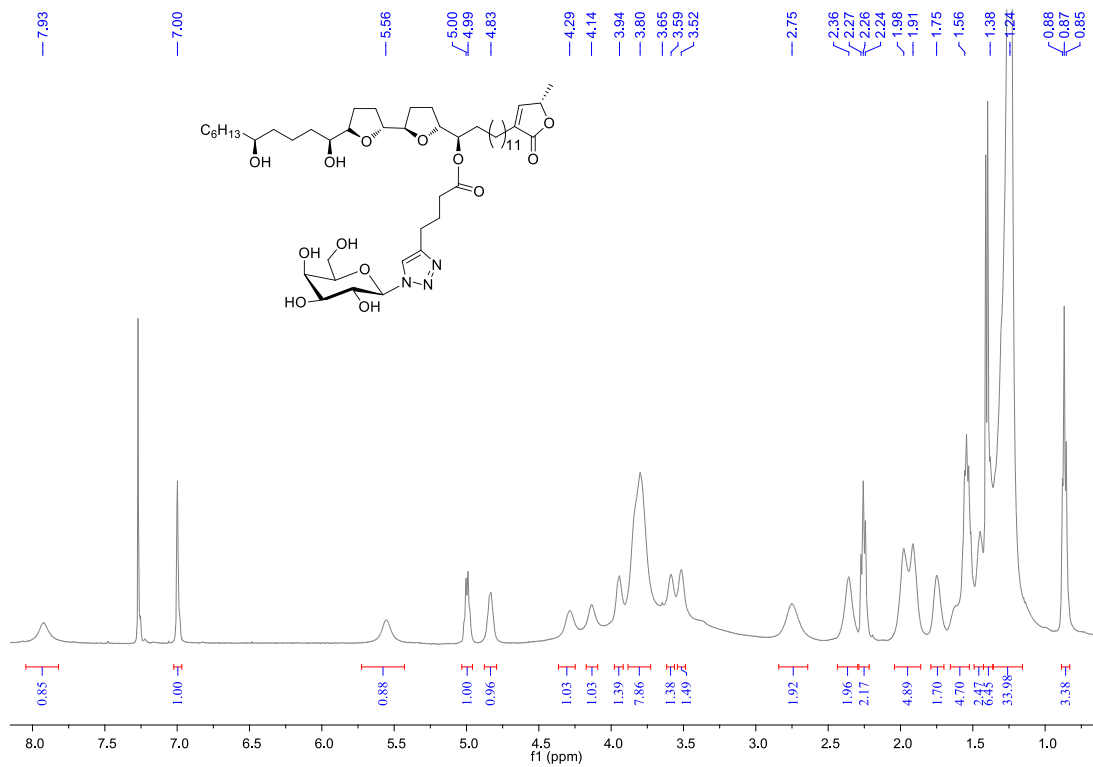

Figure 5s. <sup>1</sup>H NMR Spectrum of 11 (600 MHz, CDCl<sub>3</sub>)

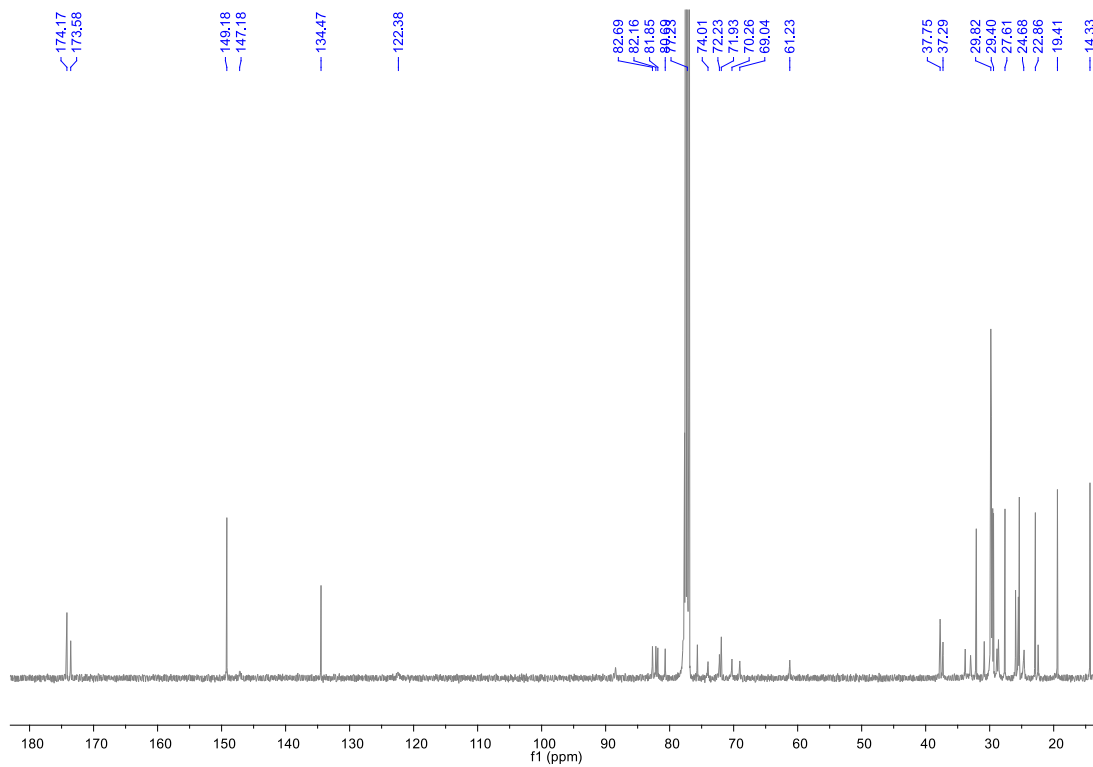

Figure 6s. <sup>13</sup>C NMR Spectrum of 11 (150 MHz, CDCl<sub>3</sub>)

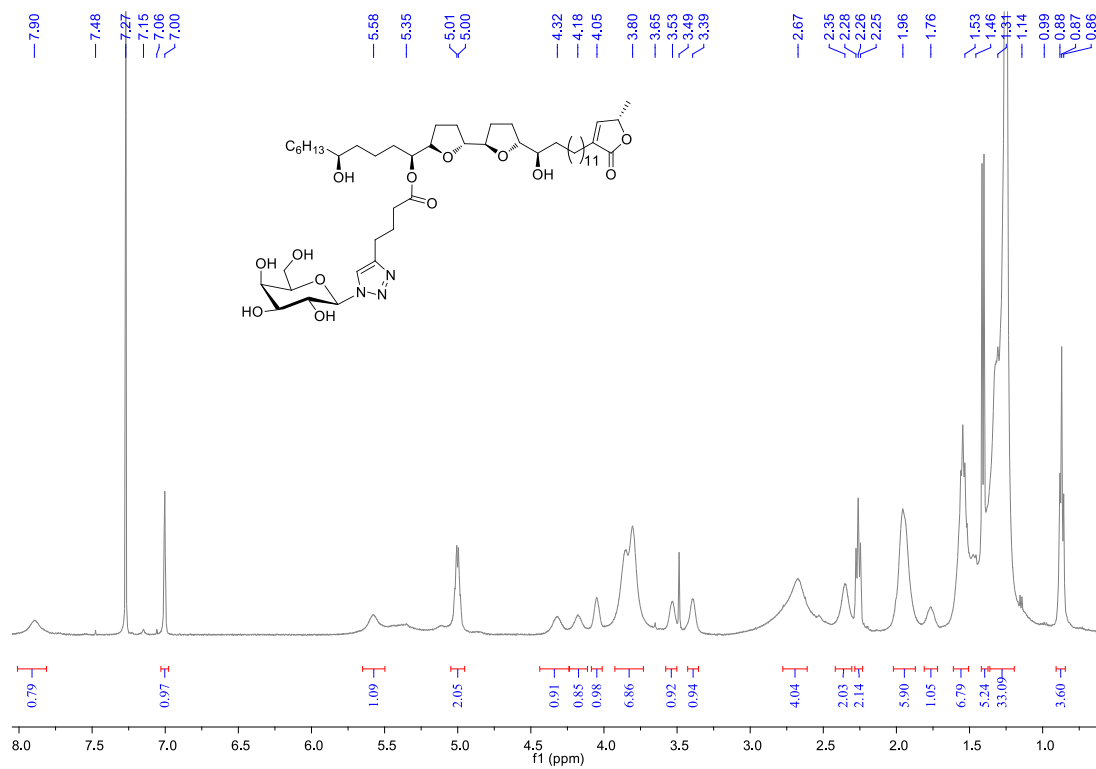

Figure 7s. <sup>1</sup>H NMR Spectrum of 12 (600 MHz, CDCl<sub>3</sub>)

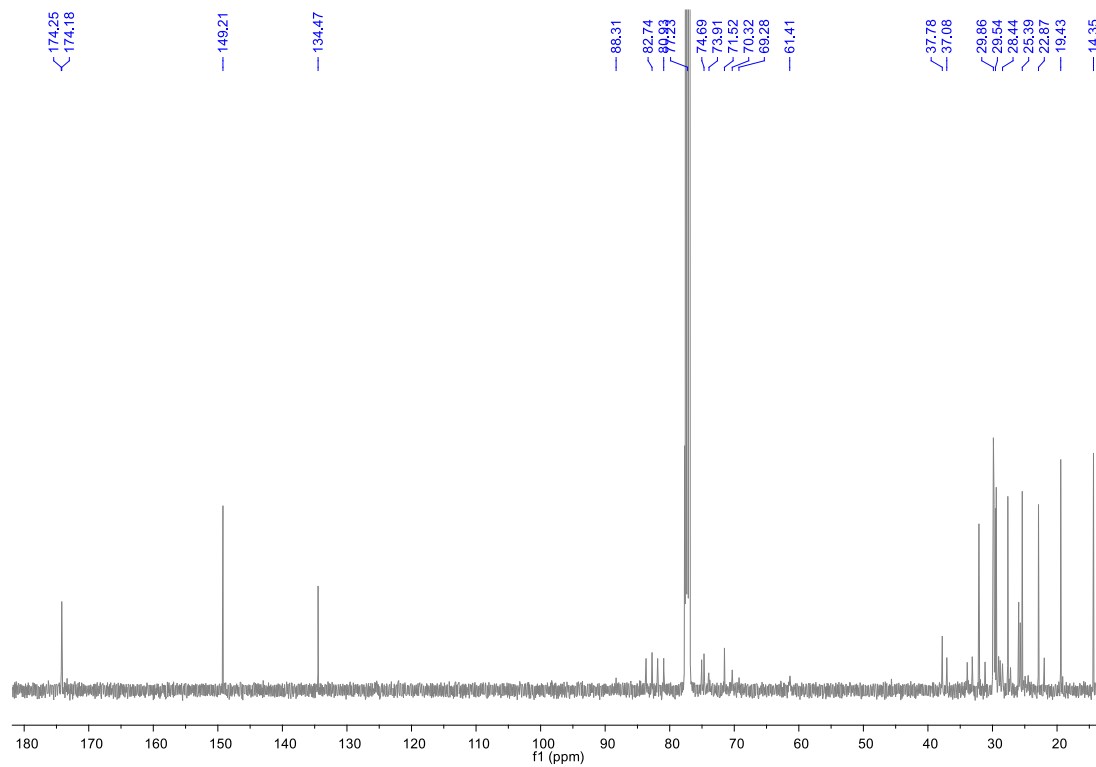

Figure 8s. <sup>13</sup>C NMR Spectrum of 12 (150 MHz, CDCl<sub>3</sub>)

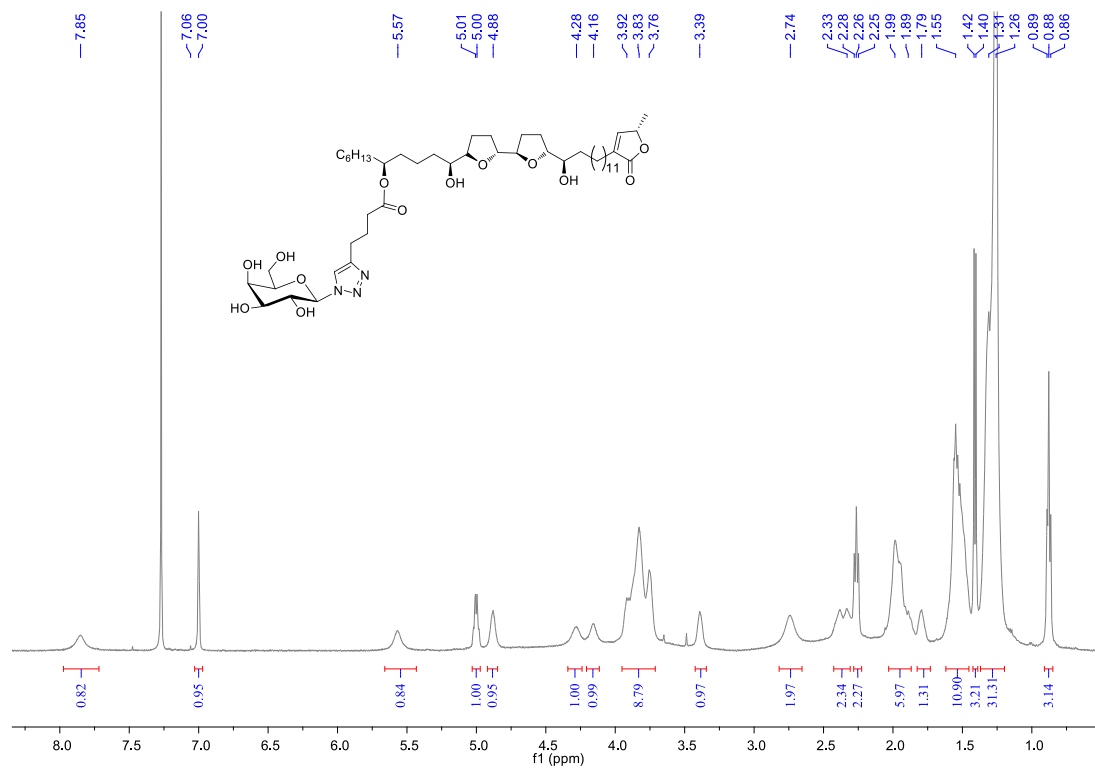

Figure 9s.  $^1\text{H}$  NMR Spectrum of 13 (600 MHz,  $\text{CDCl}_3$ )

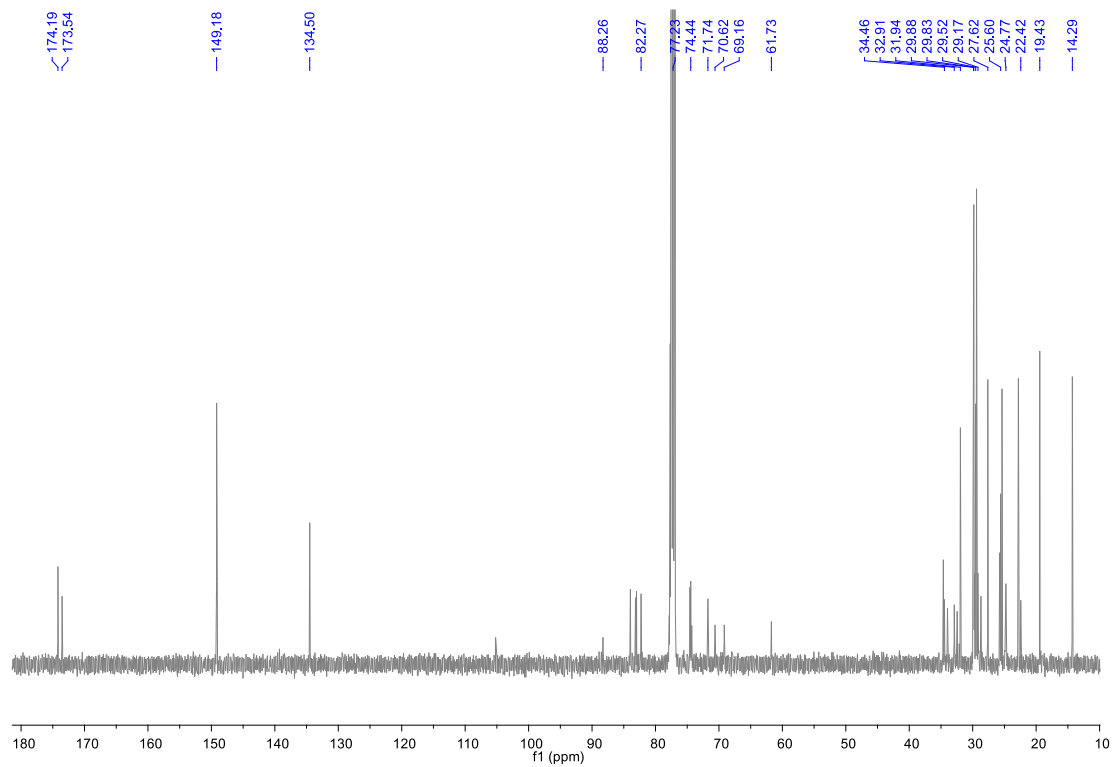

Figure 10s.  $^{13}\text{C}$  NMR Spectrum of 13 (150 MHz,  $\text{CDCl}_3$ )

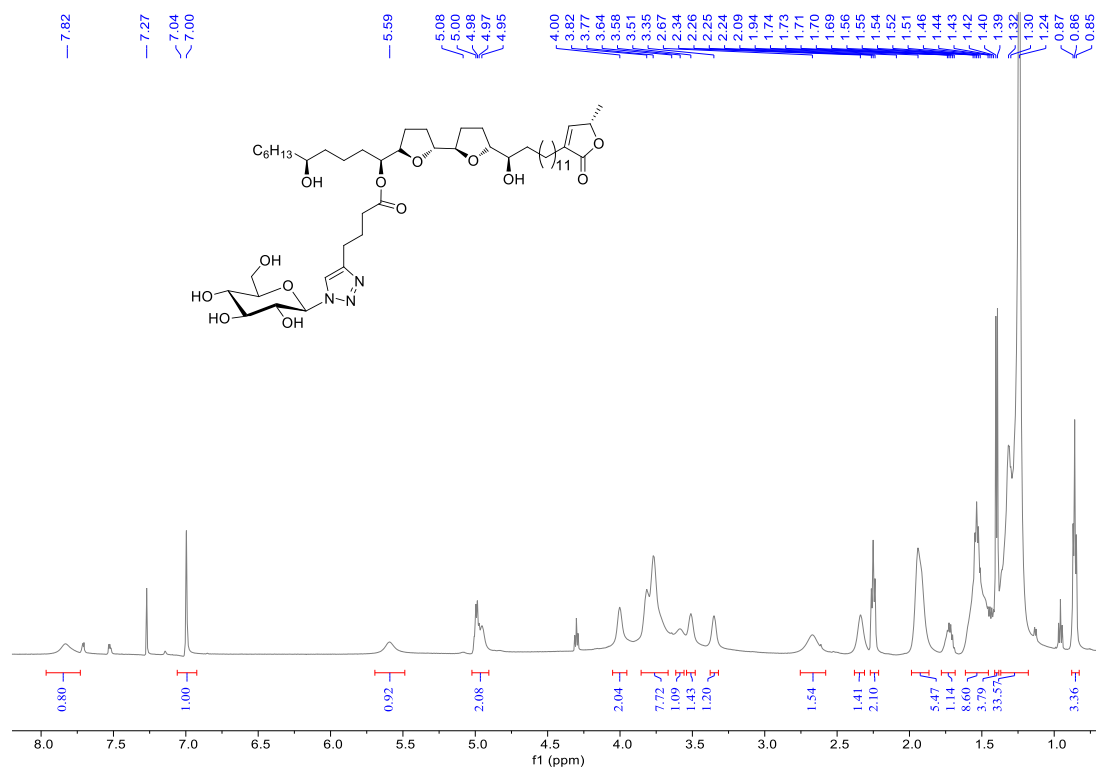

Figure 11s. <sup>1</sup>H NMR Spectrum of 14 (600 MHz, CDCl<sub>3</sub>)

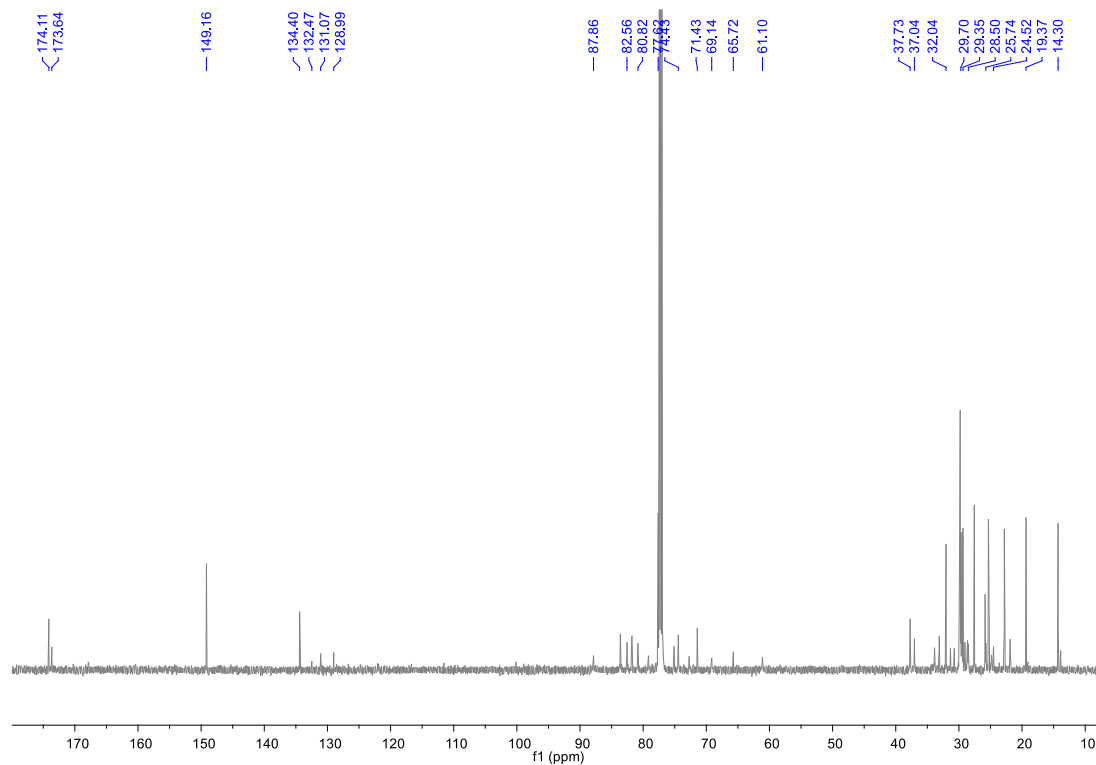

Figure 12s. <sup>13</sup>C NMR Spectrum of 14 (150 MHz, CDCl<sub>3</sub>)

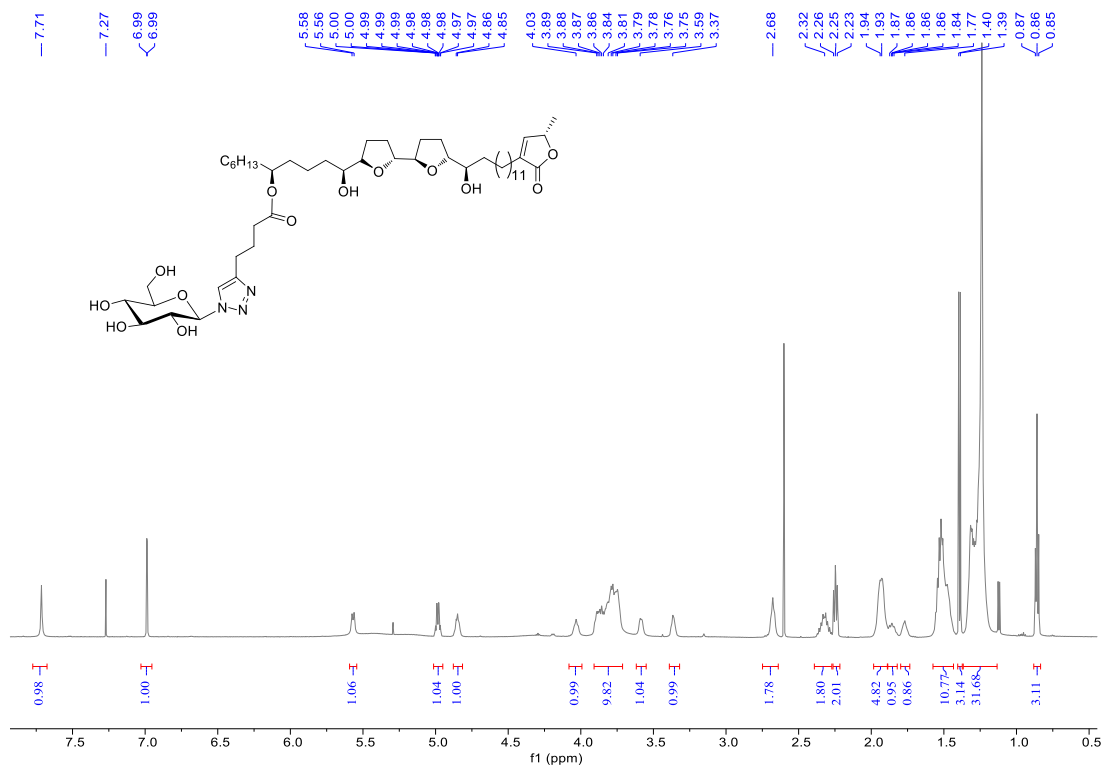

Figure 13s. <sup>1</sup>H NMR Spectrum of 15 (600 MHz, CDCl<sub>3</sub>)

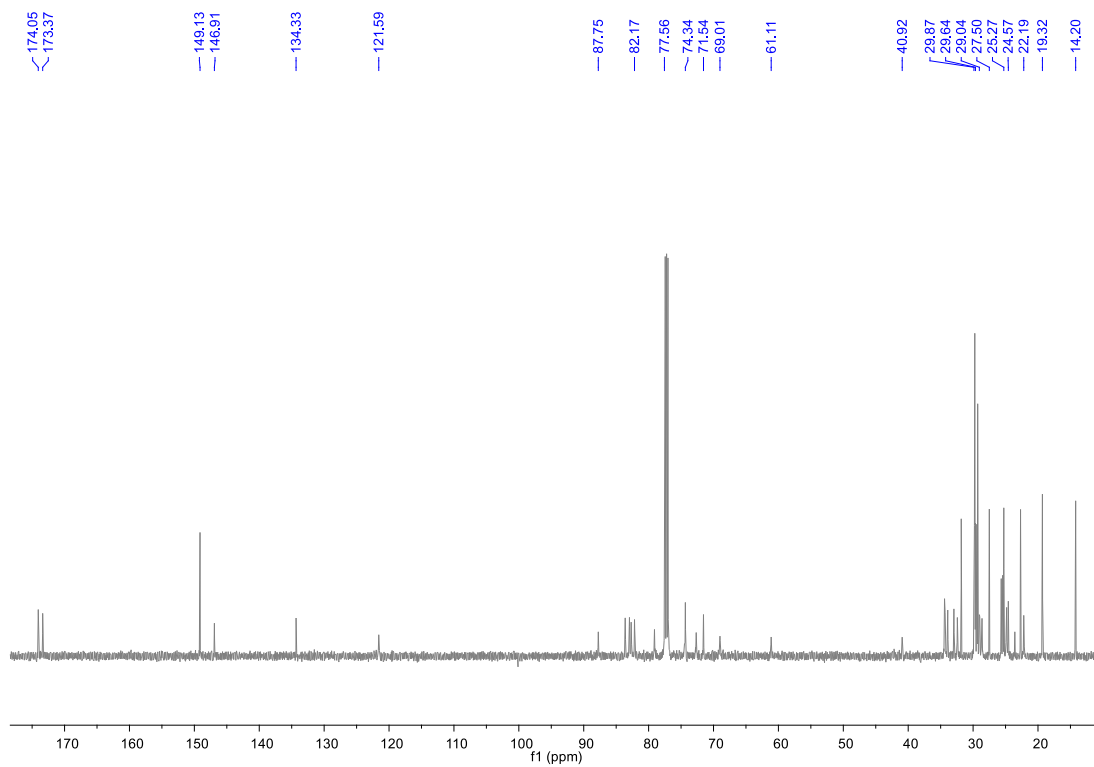

Figure 14s. <sup>13</sup>C NMR Spectrum of 15 (150 MHz, CDCl<sub>3</sub>)



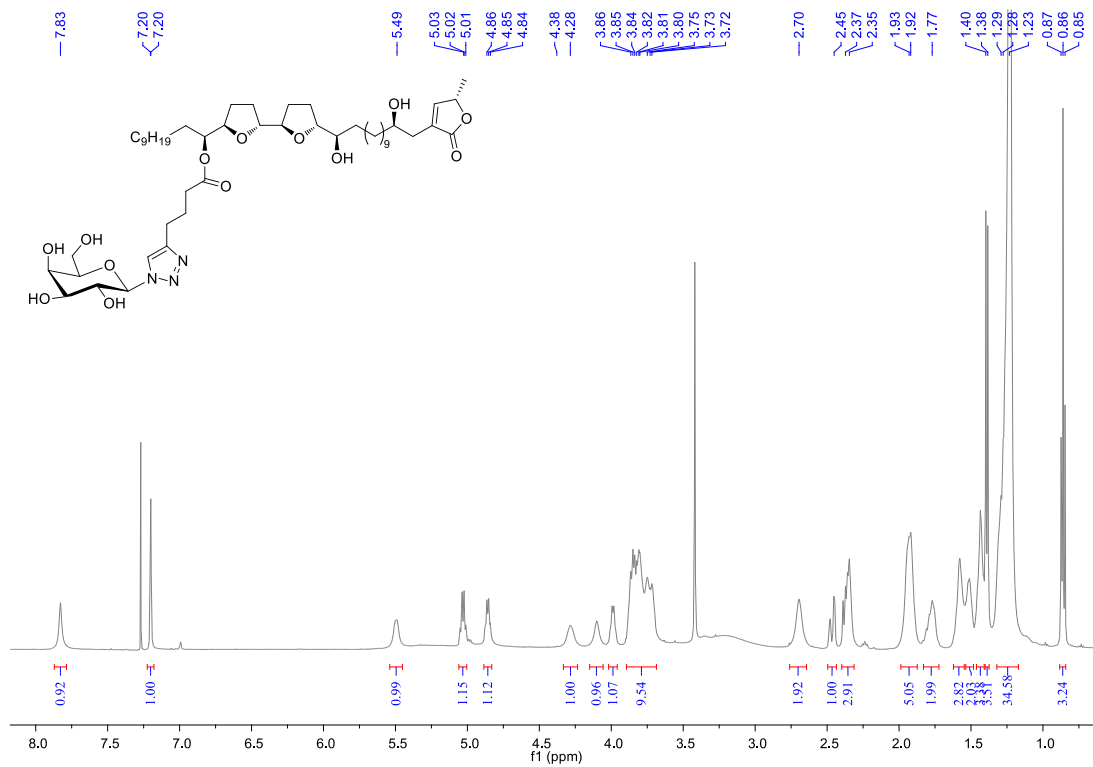

**Figure 15s. <sup>1</sup>H NMR Spectrum of 17 (600 MHz, CDCl<sub>3</sub>)**

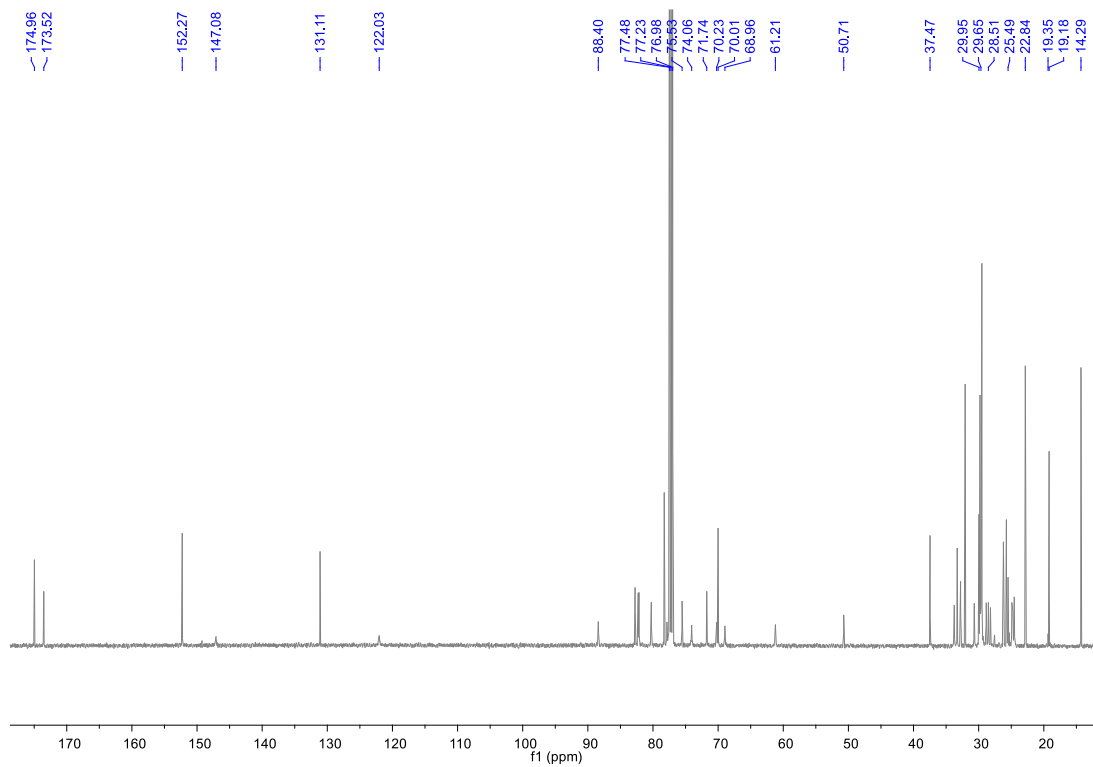

**Figure 16s. <sup>13</sup>C NMR Spectrum of 17 (150 MHz, CDCl<sub>3</sub>)**

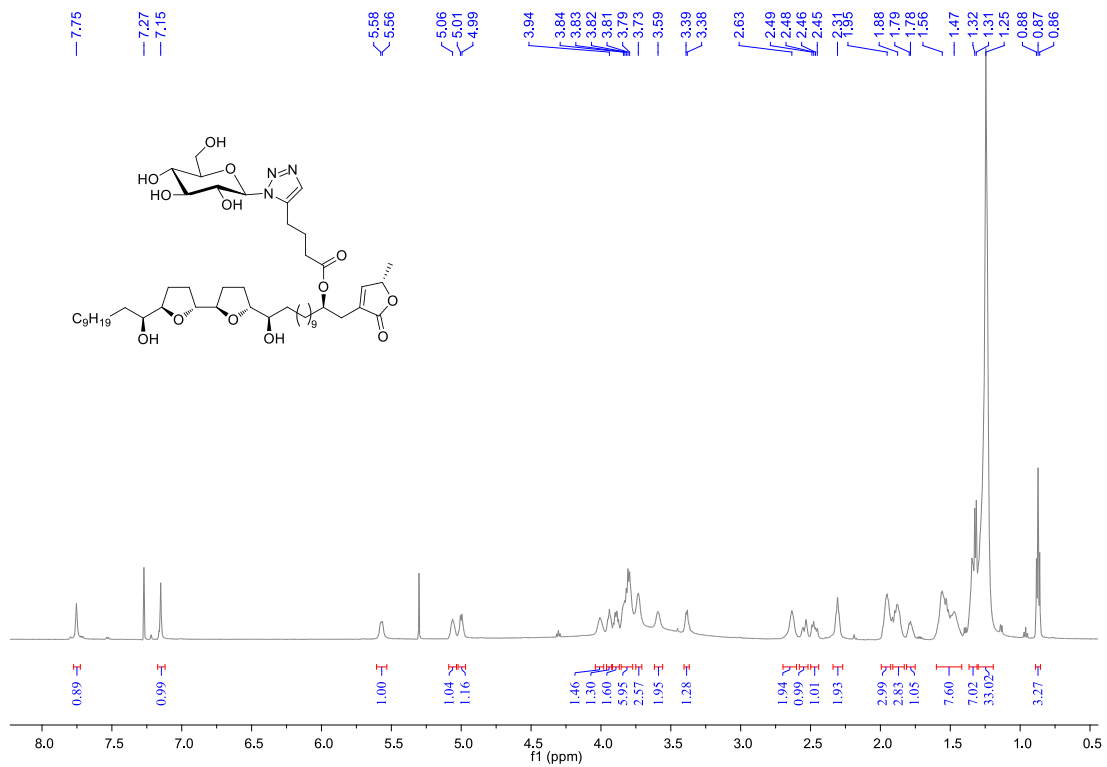

Figure 17s.  $^1\text{H}$  NMR Spectrum of 18 (600 MHz,  $\text{CDCl}_3$ )

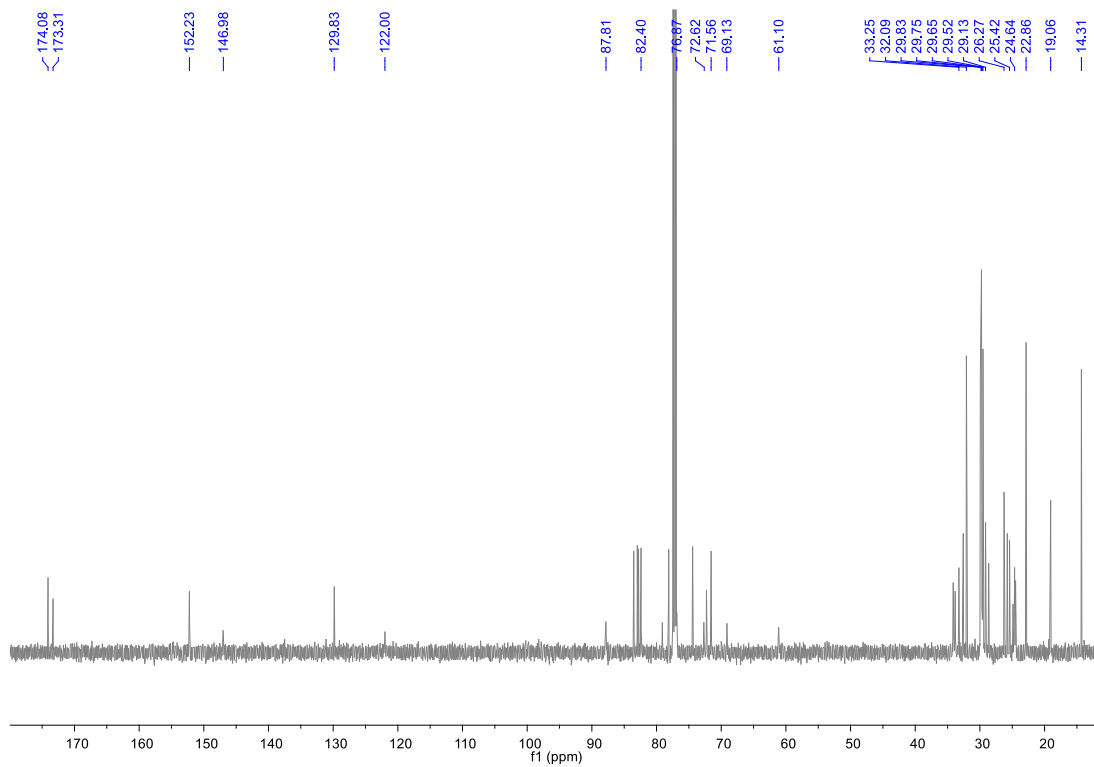

Figure 18s.  $^{13}\text{C}$  NMR Spectrum of 18 (150 MHz,  $\text{CDCl}_3$ )
